# Supplementary material for: Covalently bonded interfaces with delocalized π electrons in a MOF-in-MOF heterojunction for efficient gas–solid phase CO2 photoreduction
Source: Royal Society of Chemistry journal article supplement (doi:10.1039/d5ta00012b), 2025-01-01
Supplement: d5ta00012b1.pdf [file d5ta00012b1.pdf]

## Electronic Supplementary Information

### Covalently Bonded Interfaces with Delocalized $\pi$ Electrons in MOF-in-MOF Heterojunction for Efficient Gas-Solid Phase CO<sub>2</sub> Photoreduction

Rou-Yu Li, Wenyu Yuan\*, Meng-Ru Cui, Boda Li, Hui Zhang, Zhenhao Peng, Quan-Guo Zhai \*

Key Laboratory of Macromolecular Science of Shaanxi Province, School of Chemistry & Chemical Engineering, Shaanxi Normal University, Xi'an, Shaanxi, 710062, China.

\*Email: wenyu.yuan@snnu.edu.cn, zhaiqg@snnu.edu.cn

#### **This PDF file includes:**

Supplementary calculation details

Figs. S1 to S32

Tables S1 to S3

References S1 to S13

Pages S1 to S38

## Supplementary calculation details

The equation of plotting standard curve according to the relations of chromatographic peak area and concentration of target gases are shown as follows:

$$n = \frac{c * 180 * 1000}{1000000 * 22.4} \mu \text{ mol} \quad (1)$$

The yield (R), evolution and selectivity of CO and CH<sub>4</sub> for the catalyst were tested under the same reaction conditions as the standard conditions and calculated from Equation (2), Equation (3) and Equation (4).

$$Evolution = \frac{n}{m} \mu \text{mol g}^{-1} \quad (2)$$

$$R = \frac{Evolution}{t} \mu \text{mol g}^{-1} \text{ h}^{-1} \quad (3)$$

$$S_{CO} = \frac{c_{CO}}{c_{CO} + c_{CH_4}} \quad (4)$$

The AQE was calculated according to the following equation where  $\nu$  (mol s<sup>-1</sup>) is the reaction rate of evolved CO<sub>2</sub> or CH<sub>4</sub> molecules, K is the number of electrons transferred by the reaction, I is the optical power density, S is the incident light area,  $\lambda$  is the incident wavelength and A is the absorbance of the reaction system.

$$AQE = \frac{1.2 \times 10^8 (\nu \times K)}{(I \times S \times \lambda \times A)} \times 100\% \quad (5)$$

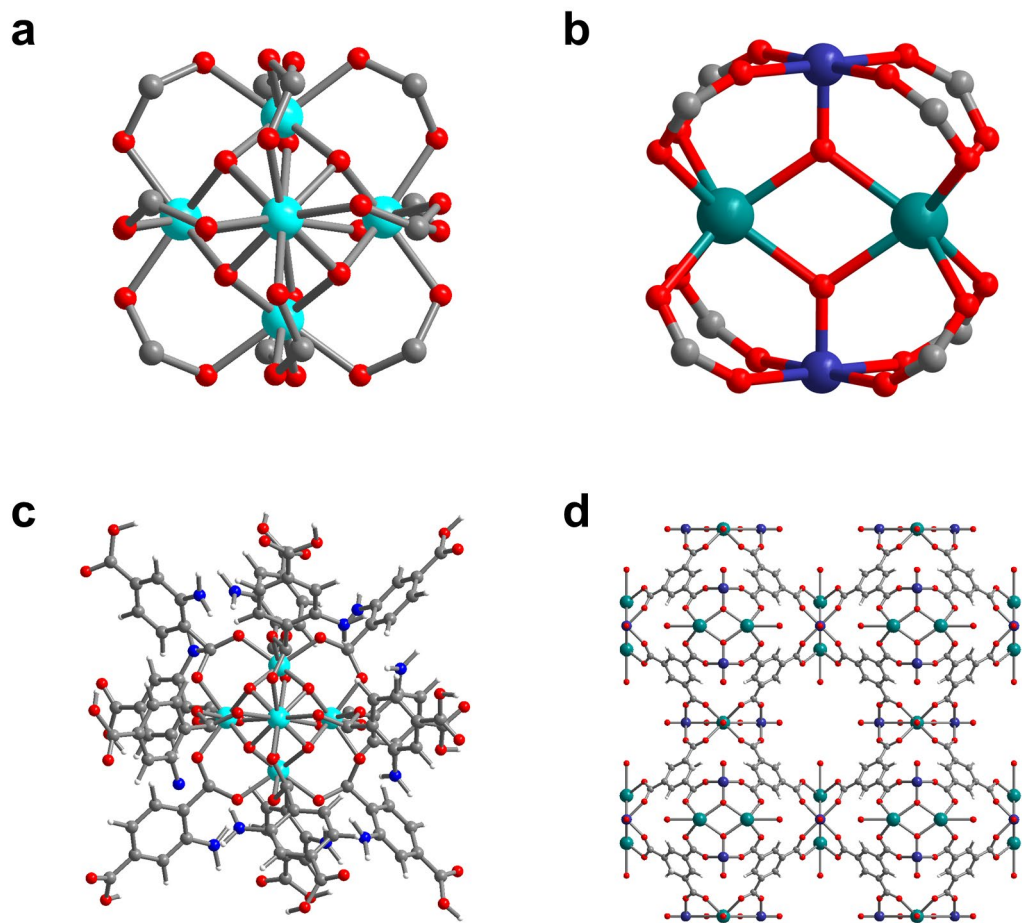

**Fig. S1** The 3D metal–organic coordination framework of (a, c) UiO-66-NH<sub>2</sub> and (b, d) MUV-10.

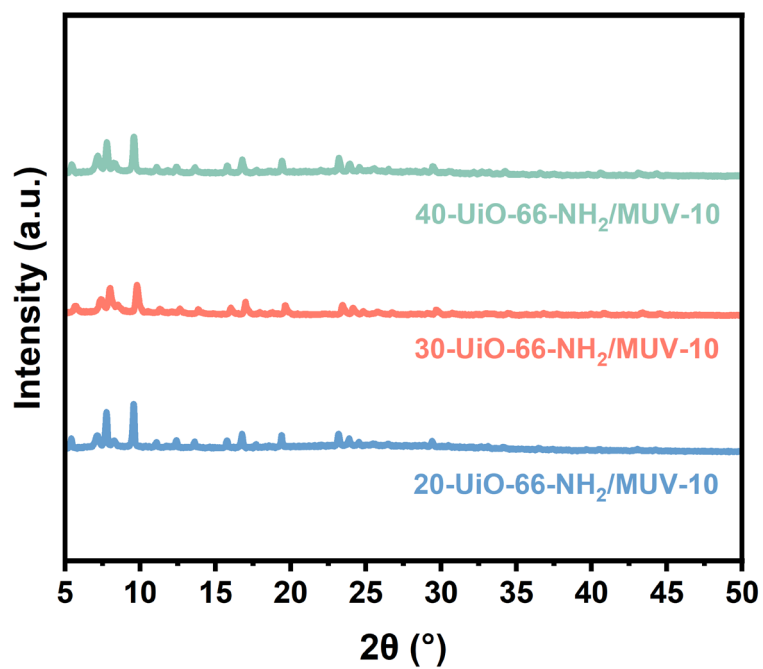

**Fig. S2** XRD patterns of 20-UiO-66-NH<sub>2</sub>/MUV-10, 30-UiO-66-NH<sub>2</sub>/MUV-10, and 30-UiO-66-NH<sub>2</sub>/MUV-10.



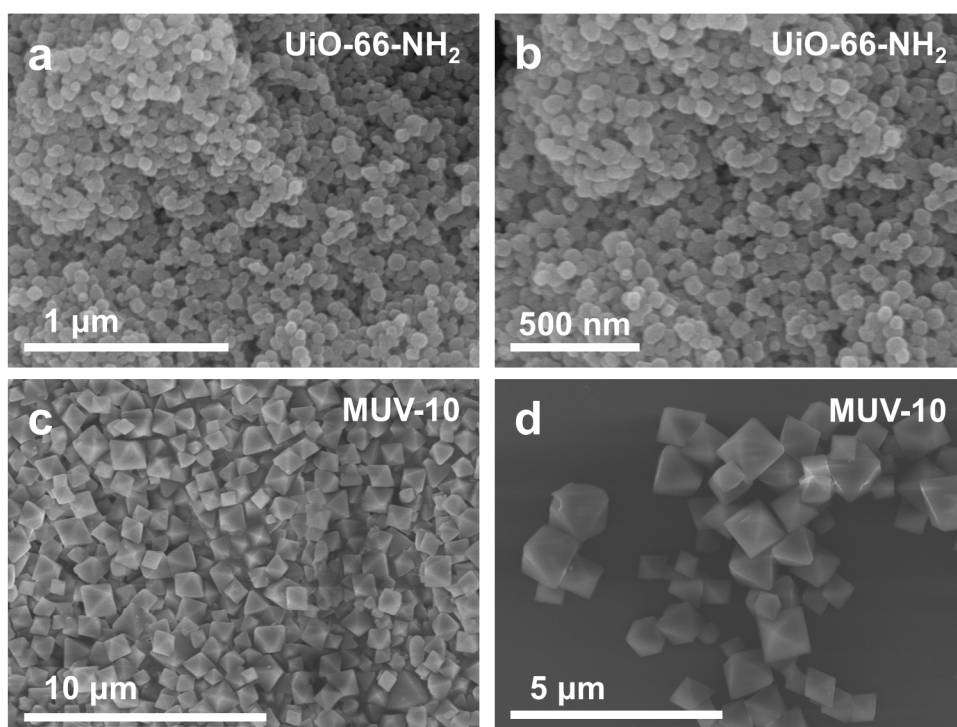

**Fig. S3** SEM images of (a-b) UiO-66-NH<sub>2</sub> and (c-d) MUV-10.

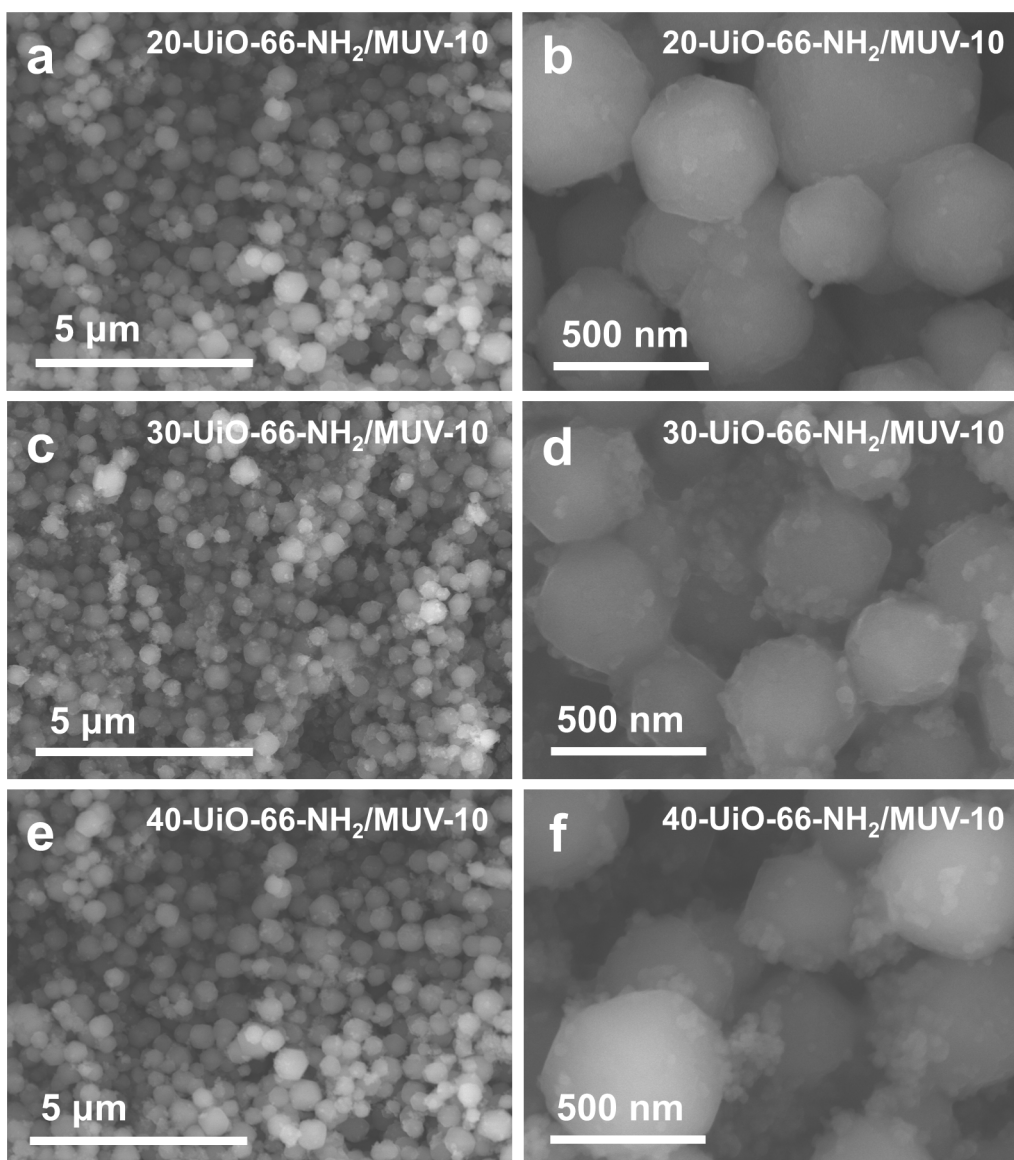

**Fig. S4** SEM images of (a-b) 20-UiO-66-NH<sub>2</sub>/MUV-10, (c-d) 30-UiO-66-NH<sub>2</sub>/MUV-10, and (e-f) 40-UiO-66-NH<sub>2</sub>/MUV-10.

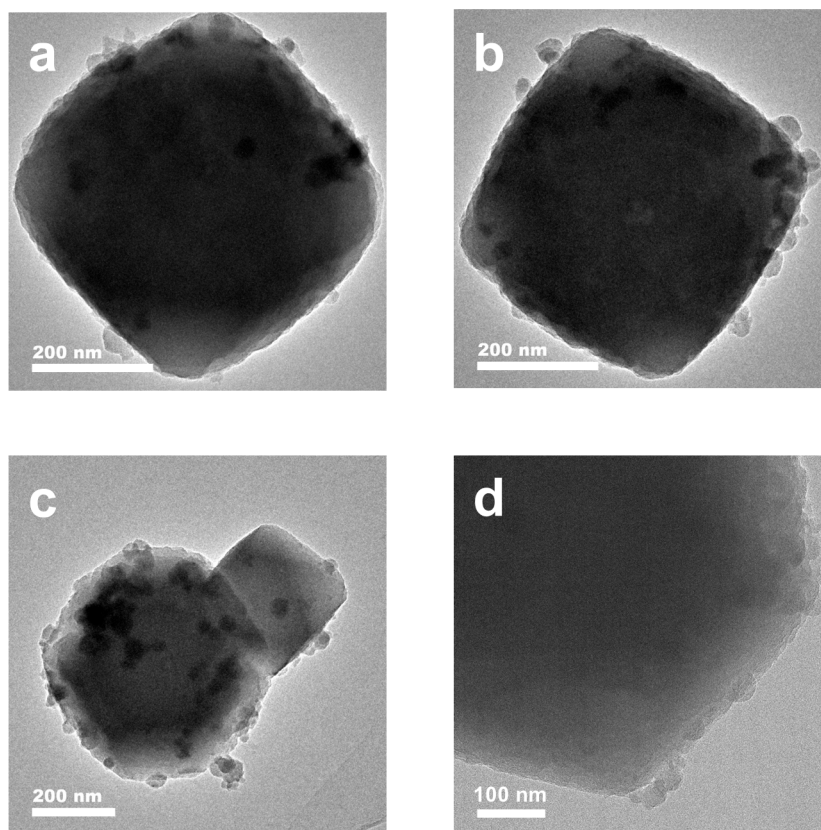

**Fig. S5** (a-d) STEM images of UiO-66-NH<sub>2</sub>/MUV-10.

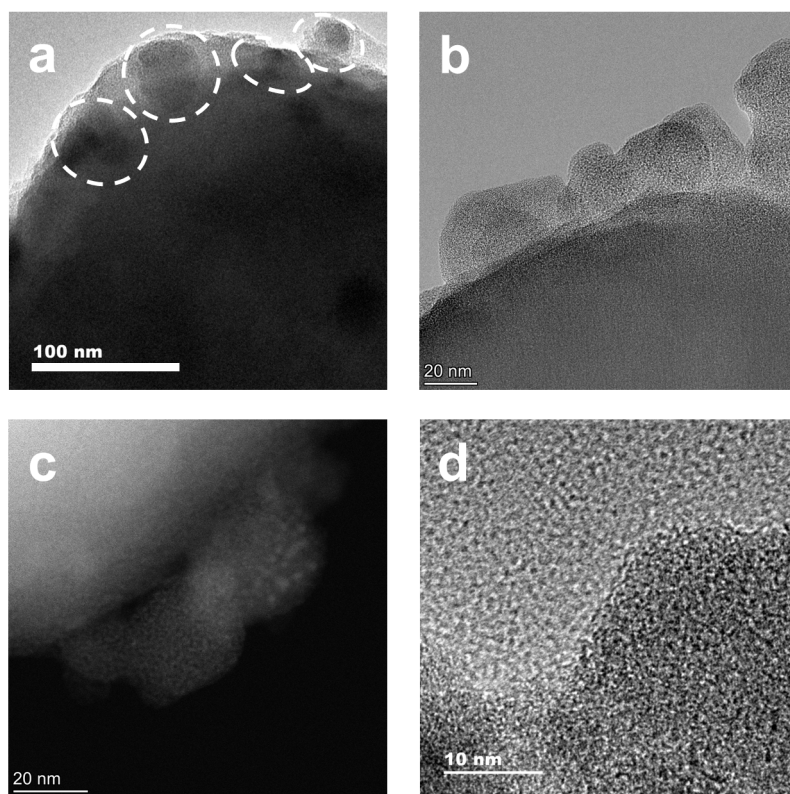

**Fig. S6** (a-d) High-resolution HAADF-STEM images of UiO-66-NH<sub>2</sub>/MUV-10.

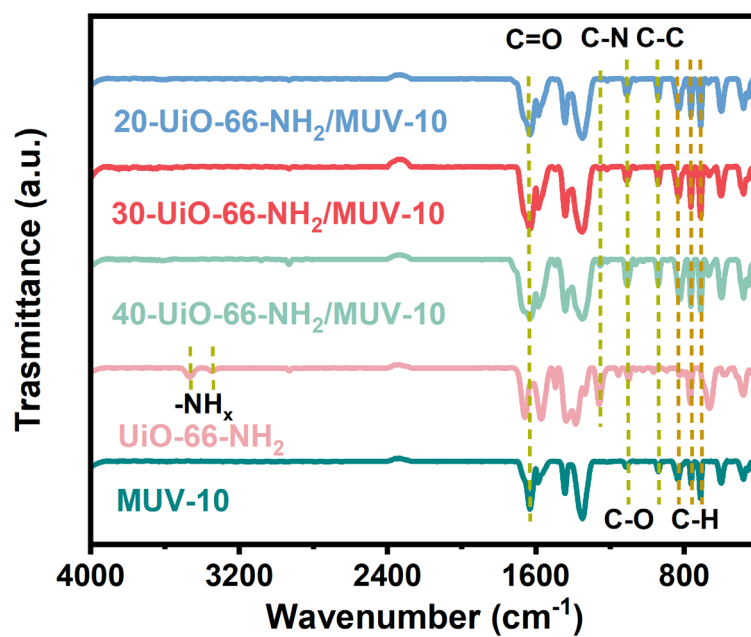

**Fig. S7** FT-IR spectra of UiO-66-NH<sub>2</sub>, MUV-10, 20-UiO-66-NH<sub>2</sub>/MUV-10, 30-UiO-66-NH<sub>2</sub>/MUV-10, and 40-UiO-66-NH<sub>2</sub>/MUV-10.

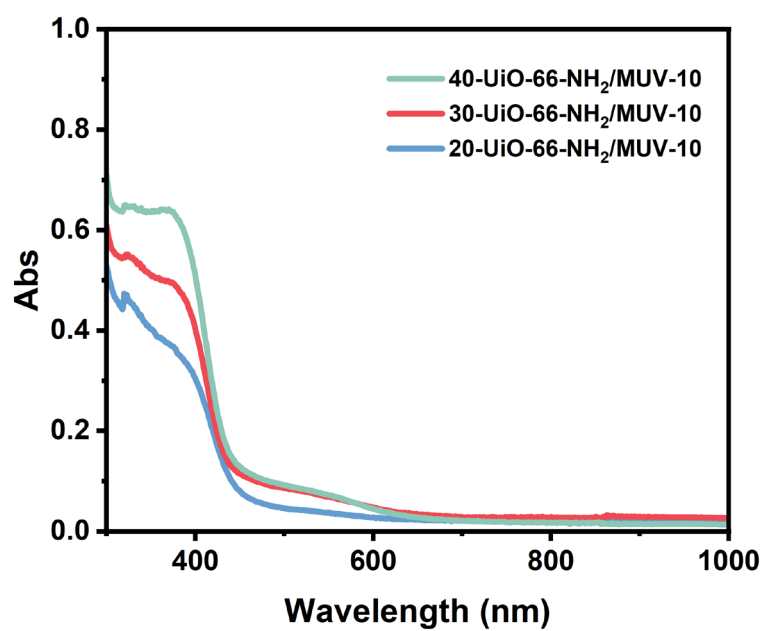

**Fig. S8** UV-vis absorption spectra of 20-UiO-66-NH<sub>2</sub>/MUV-10, 30-UiO-66-NH<sub>2</sub>/MUV-10, and 40-UiO-66-NH<sub>2</sub>/MUV-10.

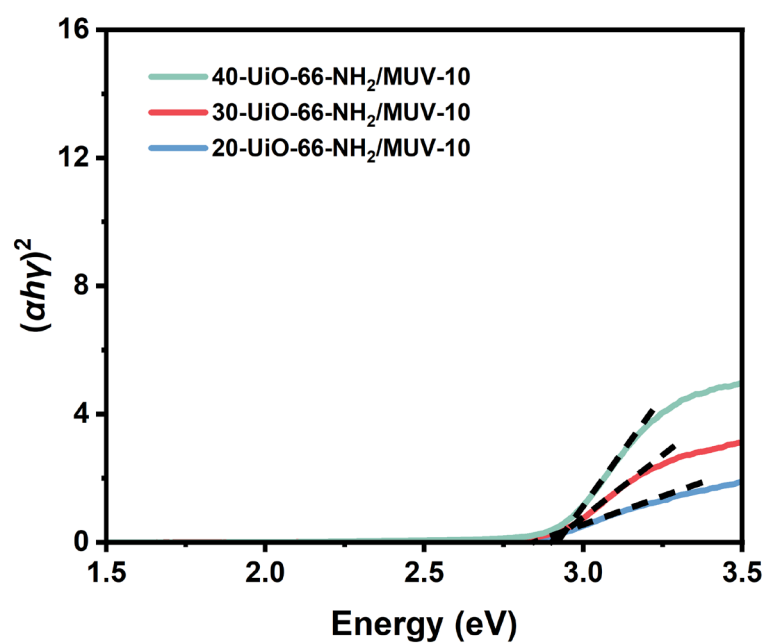

**Fig. S9** Plots of  $(\alpha h\nu)^2$  against the photonic energy of 20-UiO-66-NH<sub>2</sub>/MUV-10, 30-UiO-66-NH<sub>2</sub>/MUV-10, and 40-UiO-66-NH<sub>2</sub>/MUV-10.

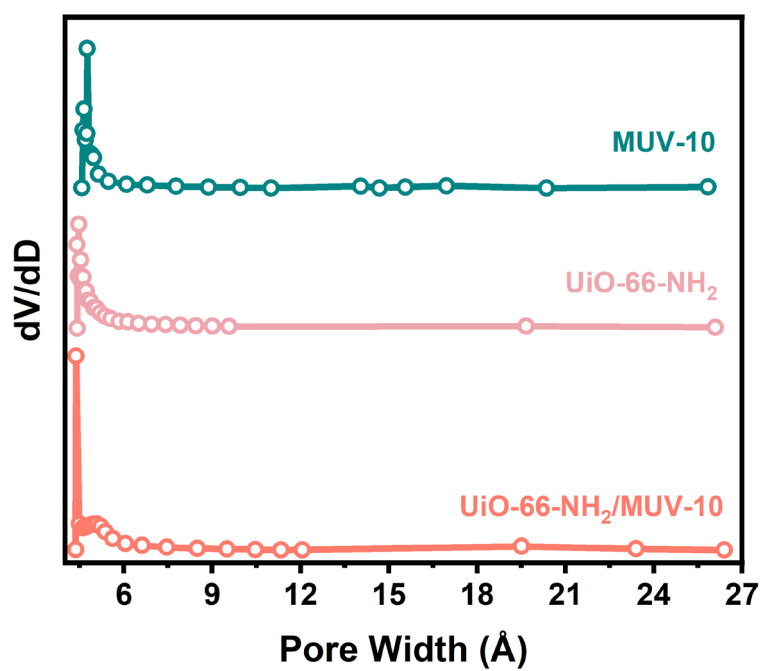

**Fig. S10** Corresponding PSD of N<sub>2</sub> adsorption-desorption isotherms at 77 K for UiO-66-NH<sub>2</sub>, MUV-10, and UiO-66-NH<sub>2</sub>/MUV-10.



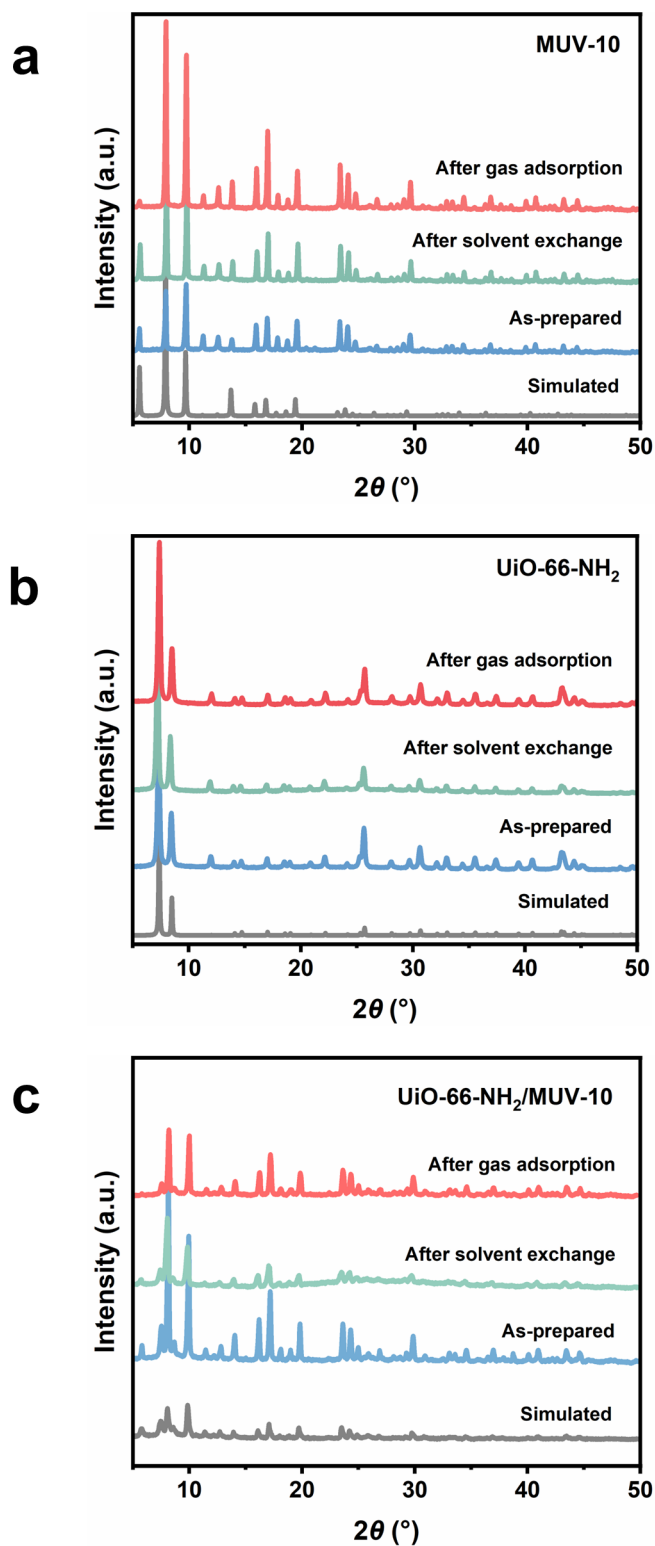

Fig. S11 PXRD patterns of (a) MUV-10, (b) UiO-66-NH<sub>2</sub>, and (c) UiO-66-NH<sub>2</sub>/MUV-10.

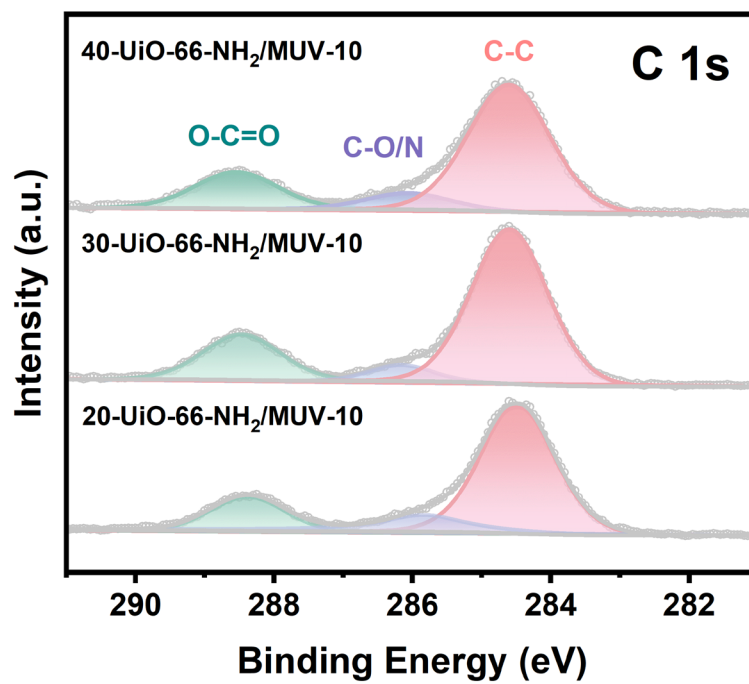

**Fig. S12** XPS spectra of C 1s in 20-UiO-66-NH<sub>2</sub>/MUV-10, 30-UiO-66-NH<sub>2</sub>/MUV-10, and 40-UiO-66-NH<sub>2</sub>/MUV-10.

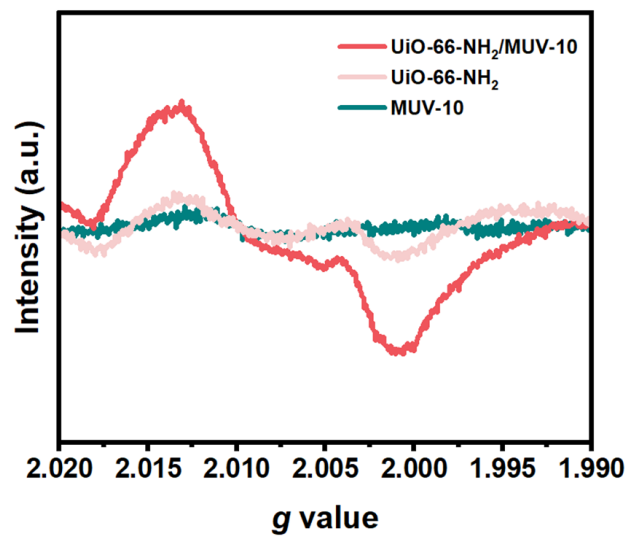

**Fig. S13** The ESR spectrum of UiO-66-NH<sub>2</sub>, MUV-10 and UiO-66-NH<sub>2</sub>/MUV-10.

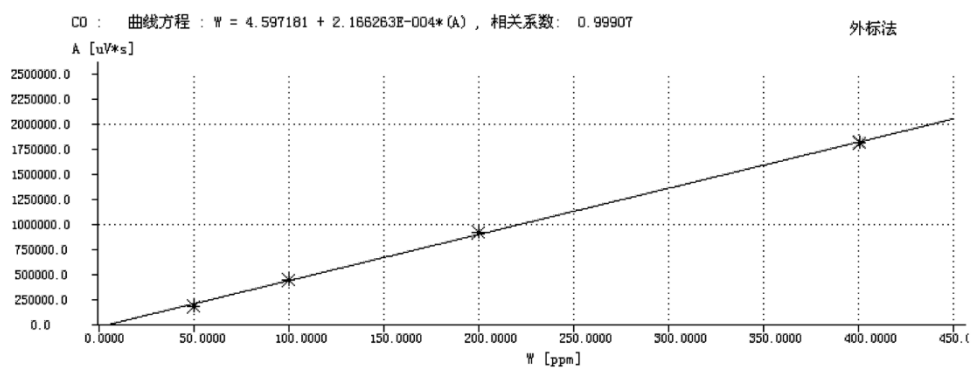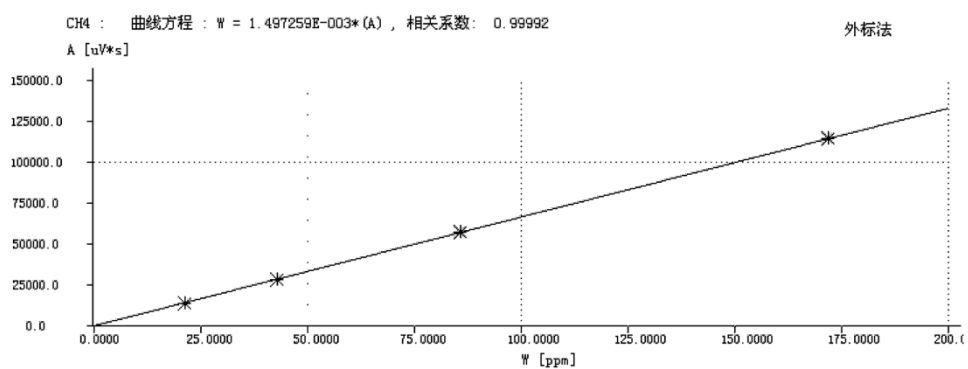

**Fig. S14** Characterization of products by gas chromatography (GC).

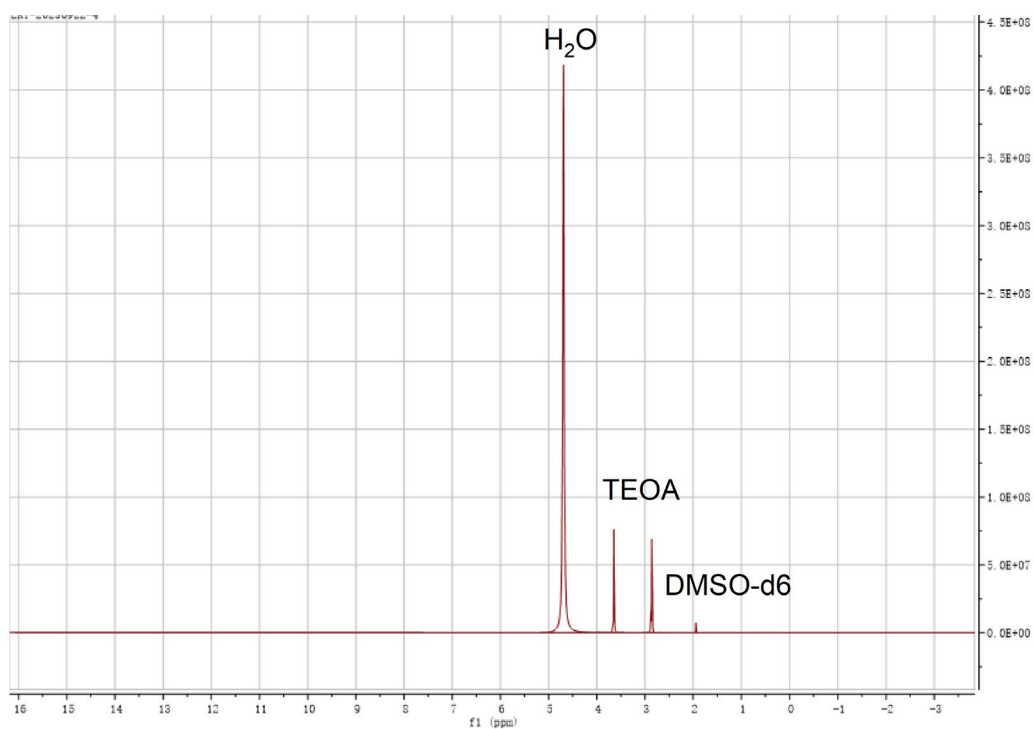

**Fig. S15** Nuclear magnetic analysis of UiO-66-NH<sub>2</sub>/MUV-10 photoreduction CO<sub>2</sub> products (in DMSO-d<sub>6</sub>).

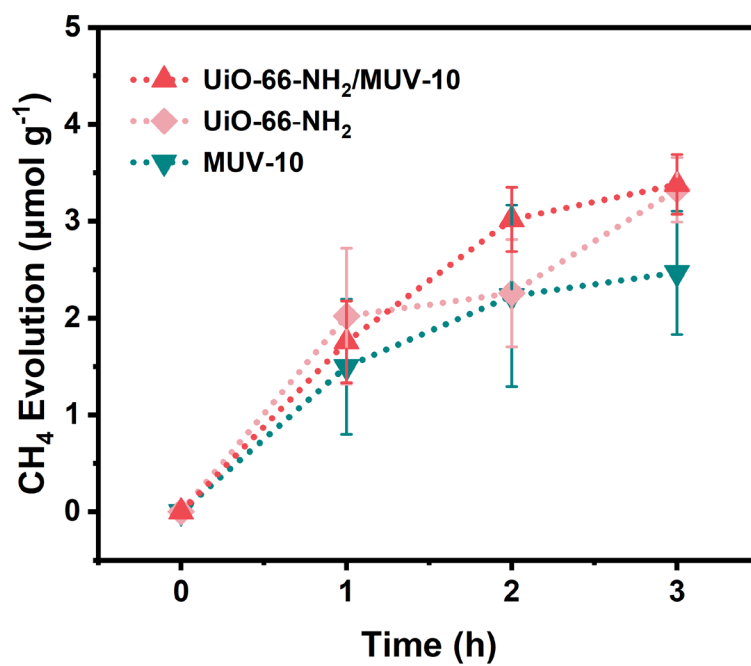

**Fig. S16** Photocatalytic CH<sub>4</sub> evolution over time for MUV-10, UiO-66-NH<sub>2</sub>, and UiO-66-NH<sub>2</sub>/MUV-10 with  $\lambda > 400$  nm filter.

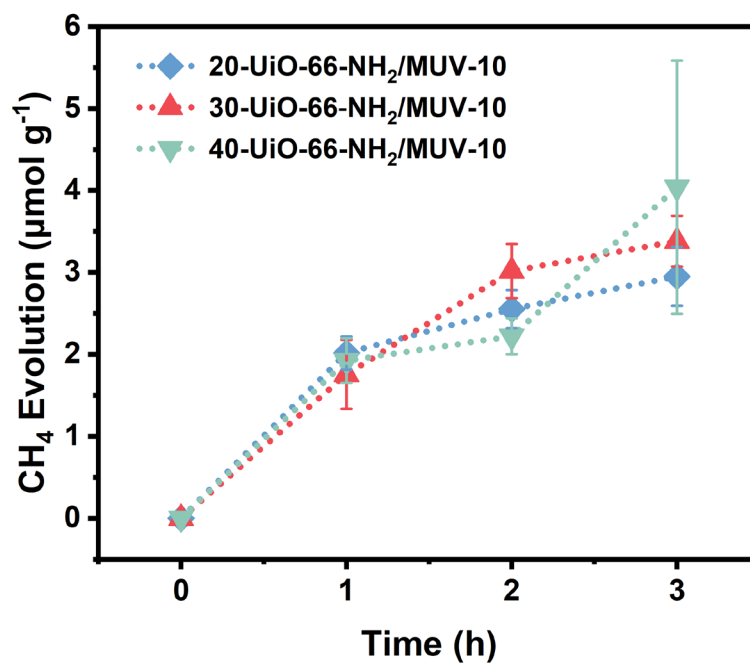

**Fig. S17** Photocatalytic CH<sub>4</sub> evolution over time for 20-UiO-66-NH<sub>2</sub>/MUV-10, 30-UiO-66-NH<sub>2</sub>/MUV-10, and 40-UiO-66-NH<sub>2</sub>/MUV-10 with  $\lambda > 400$  nm filter.

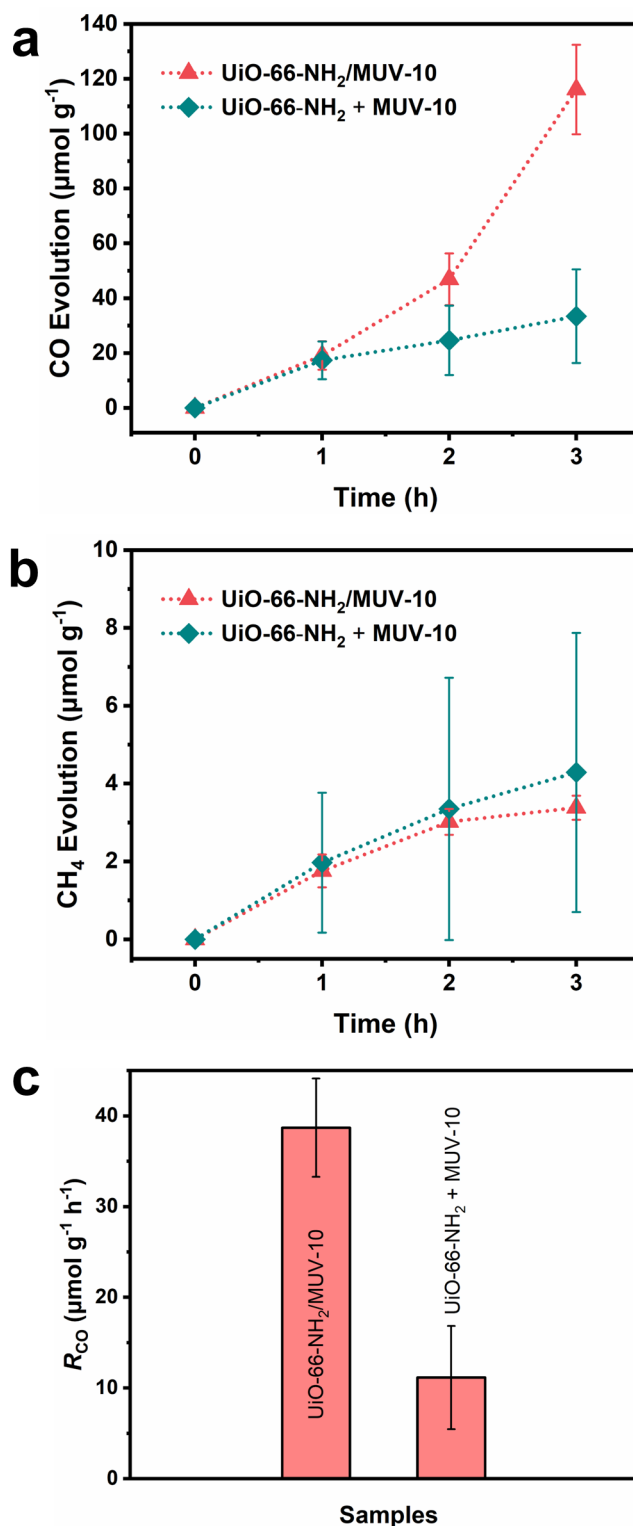

**Fig. S18** (a) Photocatalytic CO evolution over time for mechanical mixture (UiO-66-NH<sub>2</sub> + MUV-10) and UiO-66-NH<sub>2</sub>/MUV-10 with  $\lambda > 400$  nm filter. (b) Photocatalytic CO evolution over time for mechanical mixture (UiO-66-NH<sub>2</sub> + MUV-10) and UiO-66-NH<sub>2</sub>/MUV-10 with  $\lambda > 400$  nm filter. (c) Mass-normalized CO<sub>2</sub>RR rates of mechanical mixture (UiO-66-NH<sub>2</sub> + MUV-10) and UiO-66-NH<sub>2</sub>/MUV-10 with  $\lambda > 400$  nm filter.



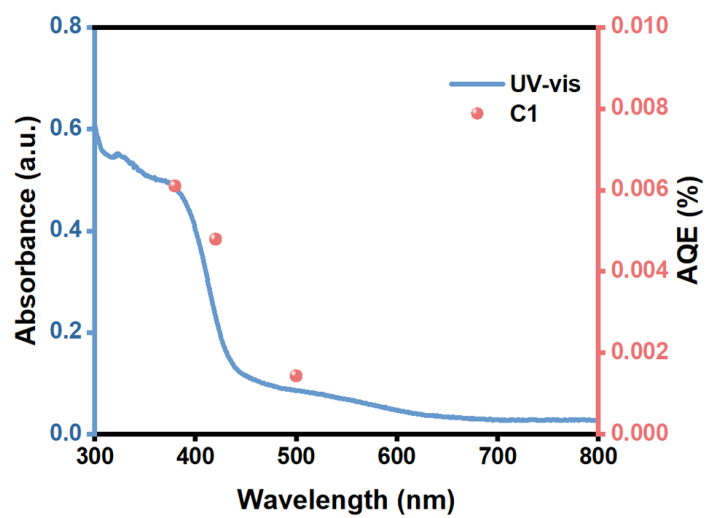

**Fig. S19** Wavelength-dependent AQE for the 30-UiO-66-NH<sub>2</sub>/MUV-10 photocatalyst.

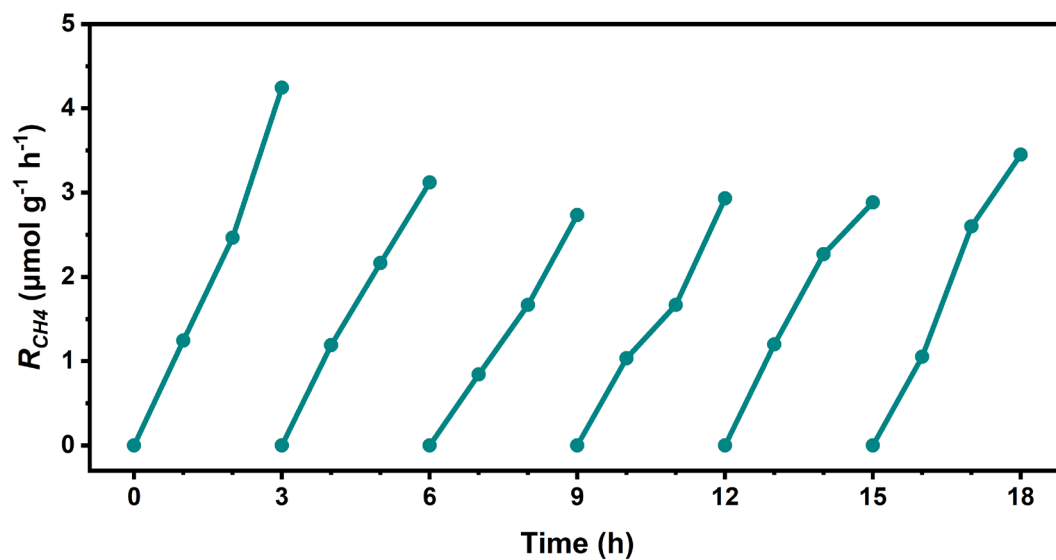

**Fig. S20** Cyclic stability for  $\text{CH}_4$  evolution of UiO-66- $\text{NH}_2$ /MUV-10.

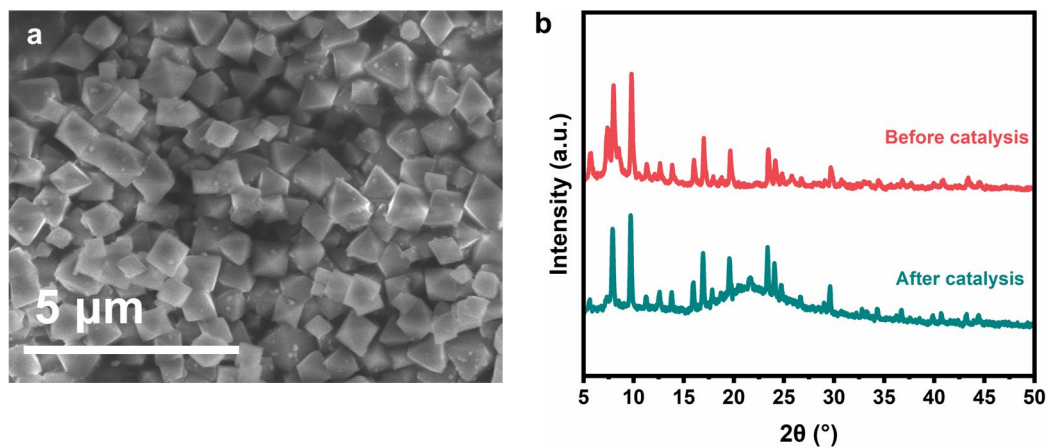

**Fig. S21** Stability of UiO-66-NH<sub>2</sub>/MUV-10. (a) SEM image of UiO-66-NH<sub>2</sub>/MUV-10 after photocatalysis. (b) PXRD patterns of UiO-66-NH<sub>2</sub>/MUV-10 before and after photocatalysis.

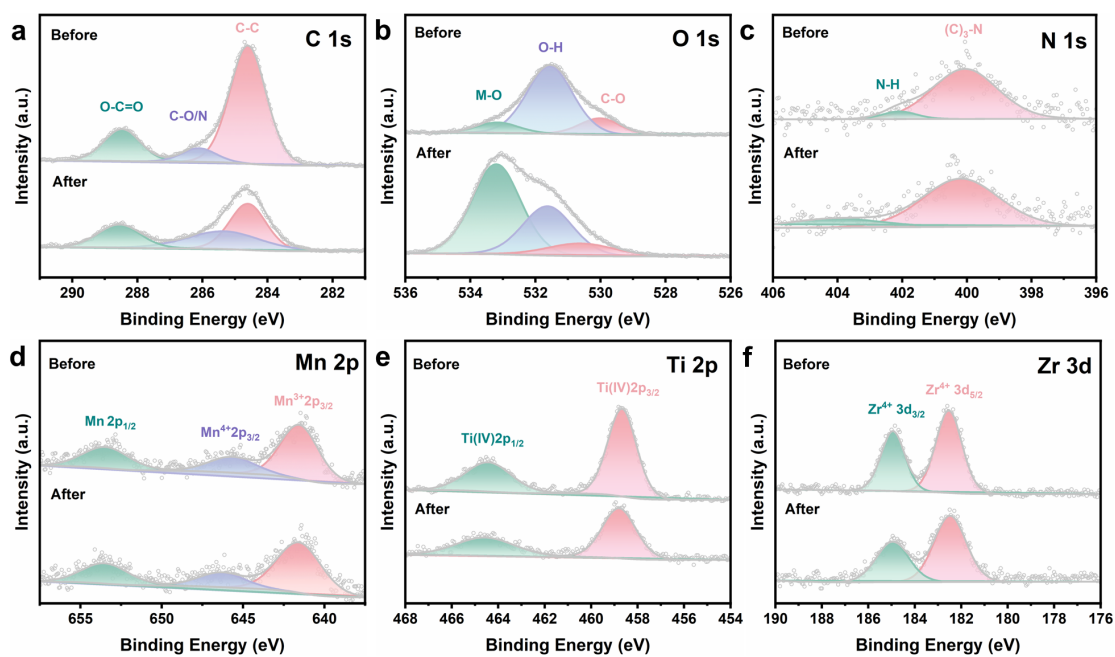

**Fig. S22** Stability of UiO-66-NH<sub>2</sub>/MUV-10. XPS spectrum (a) C 1s, (b) O 1s, (c) N 1s, (d) Zr 3d, (e) Mn 2p and (f) Ti 2p in UiO-66-NH<sub>2</sub>/MUV-10 before and after photocatalysis.

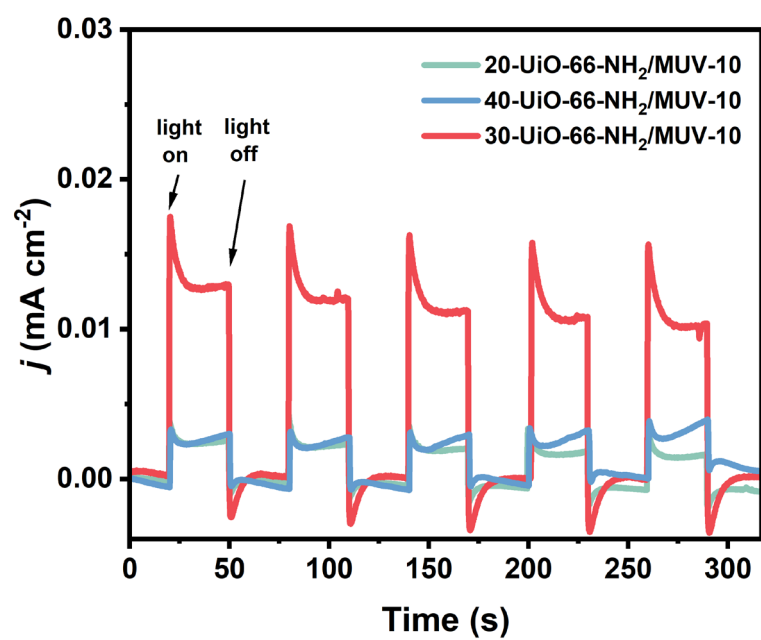

**Fig. S23** Transient photocurrent density of 20-UiO-66-NH<sub>2</sub>/MUV-10, 30-UiO-66-NH<sub>2</sub>/MUV-10, and 40-UiO-66-NH<sub>2</sub>/MUV-10.

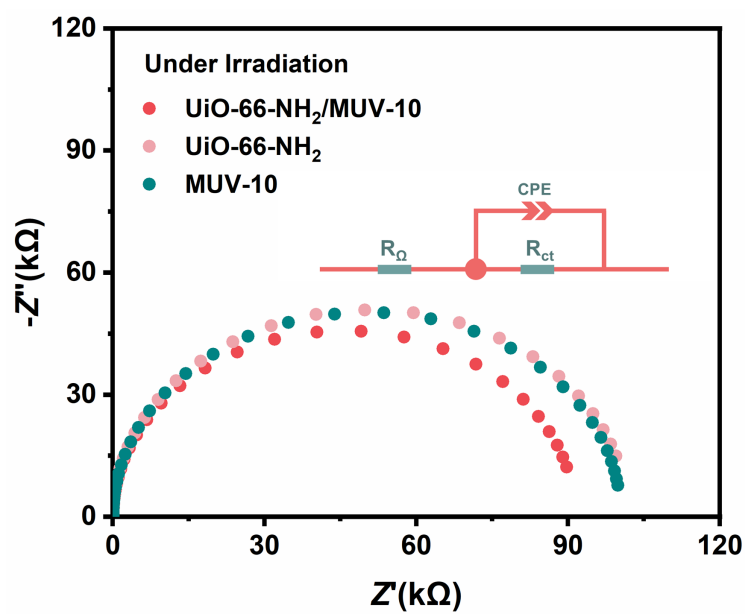

**Fig. S24** AC impedance of MUV-10, UiO-66-NH<sub>2</sub>, and UiO-66-NH<sub>2</sub>/MUV-10 under light irradiation.

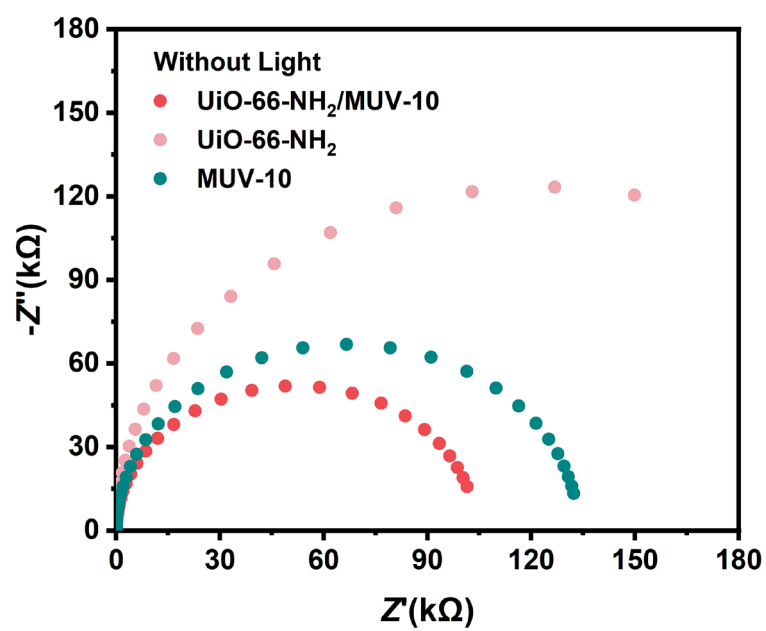

**Fig. S25** AC impedance of MUV-10, UiO-66-NH<sub>2</sub>, and UiO-66-NH<sub>2</sub>/MUV-10 without light irradiation.

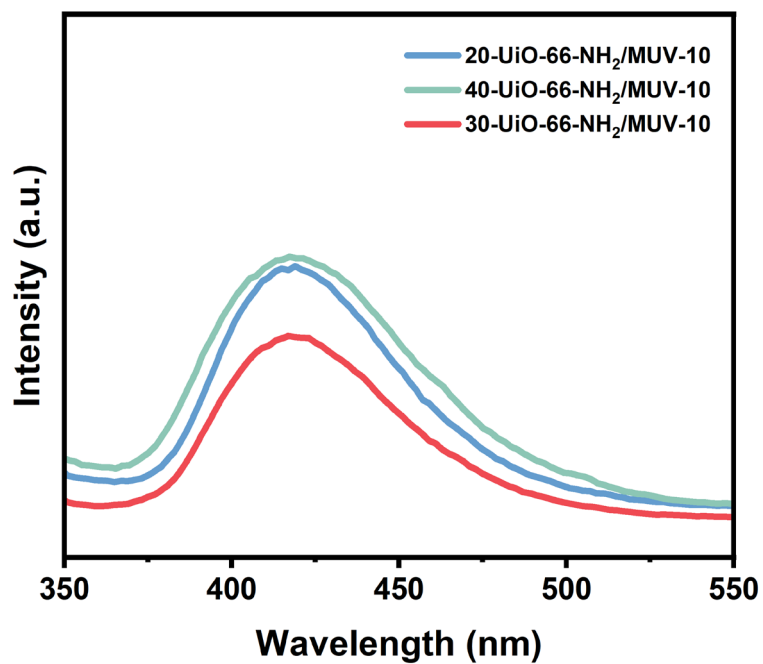

**Fig. S26** PL spectra of 20-UiO-66-NH<sub>2</sub>/MUV-10, 30-UiO-66-NH<sub>2</sub>/MUV-10, and 40-UiO-66-NH<sub>2</sub>/MUV-10.



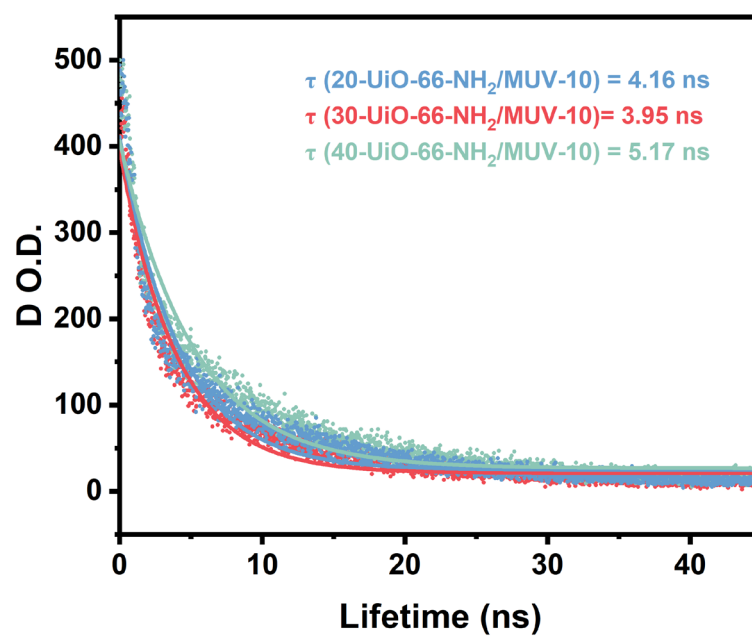

**Fig. S27** TRPL spectra of 20-UiO-66-NH<sub>2</sub>/MUV-10, 30-UiO-66-NH<sub>2</sub>/MUV-10, and 40-UiO-66-NH<sub>2</sub>/MUV-10.

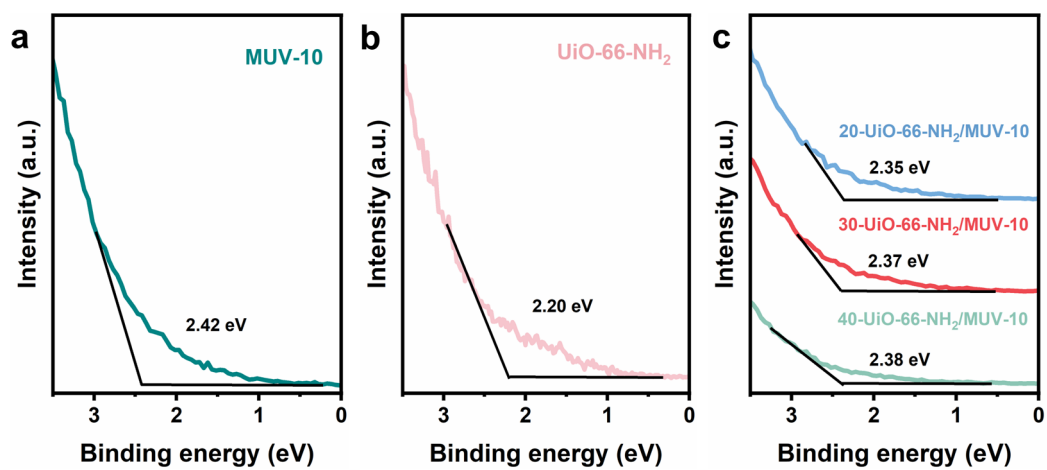

**Fig. S28** Valence band XPS of (a) MUV-10, (b) UiO-66-NH<sub>2</sub> and (c) 20-UiO-66-NH<sub>2</sub>/MUV-10, 30-UiO-66-NH<sub>2</sub>/MUV-10, and 40-UiO-66-NH<sub>2</sub>/MUV-10.

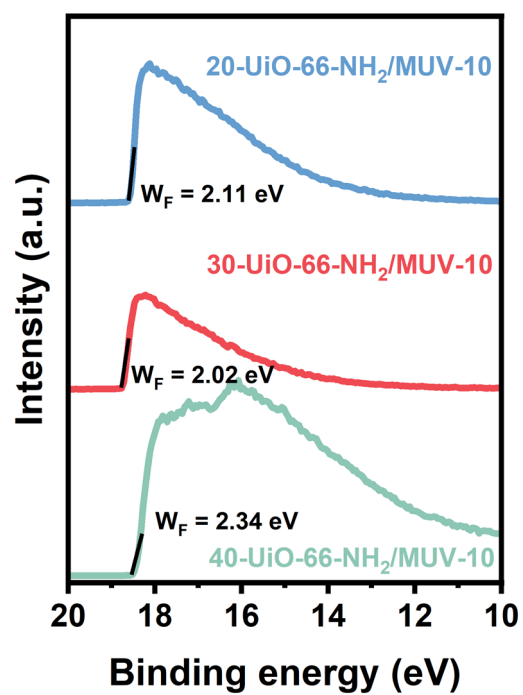

**Fig. S29** UPS spectra of 20-UiO-66-NH<sub>2</sub>/MUV-10, 30-UiO-66-NH<sub>2</sub>/MUV-10, and 40-UiO-66-NH<sub>2</sub>/MUV-10.

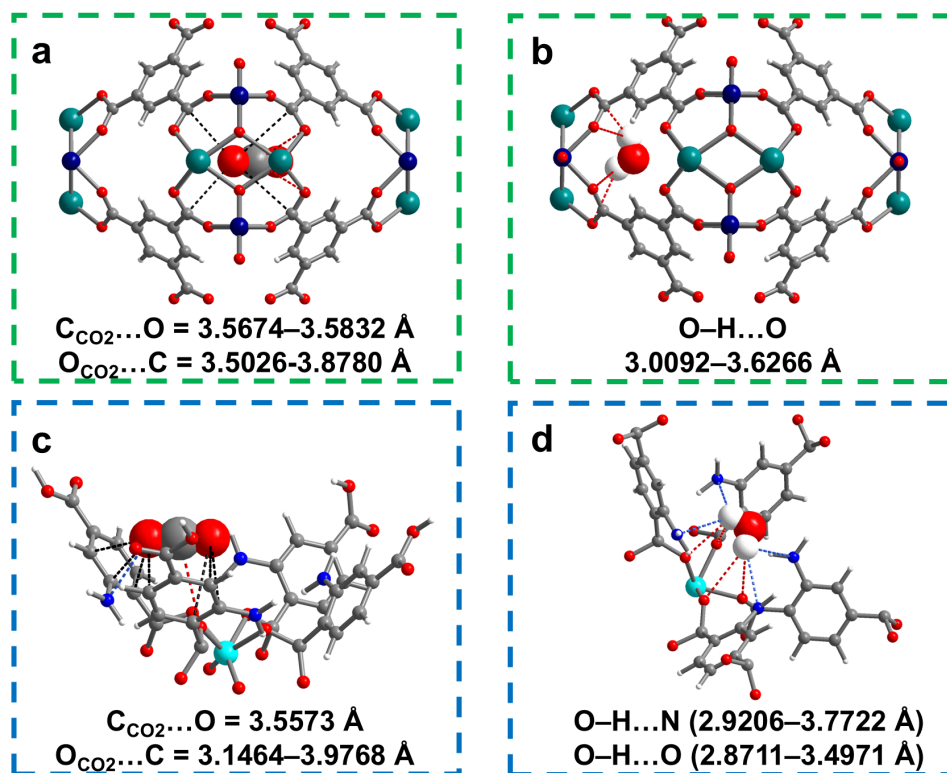

**Fig. S30** (a) CO<sub>2</sub> and (b) H<sub>2</sub>O binding sites in MUV-10, (c) CO<sub>2</sub> and (d) H<sub>2</sub>O binding sites in UiO-66-NH<sub>2</sub> absorbents determined by GCMC simulation.

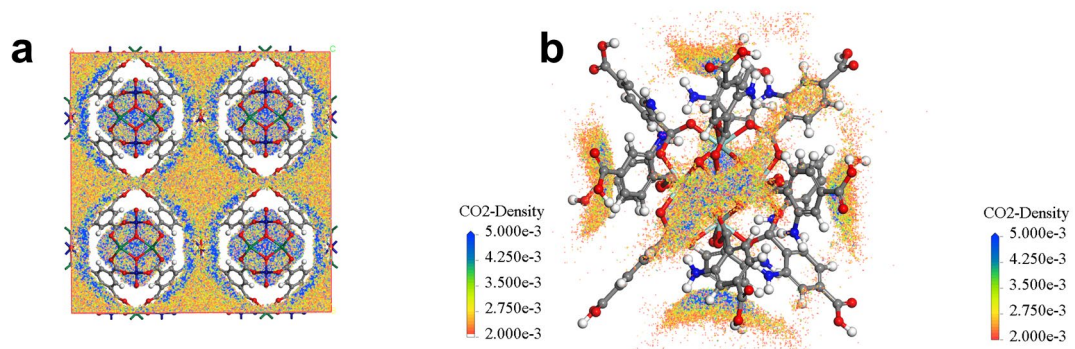

**Fig. S31** GCMC simulation for density distributions of CO<sub>2</sub> at 298 K for (a) MUV-10 and (b) UiO-66-NH<sub>2</sub>.

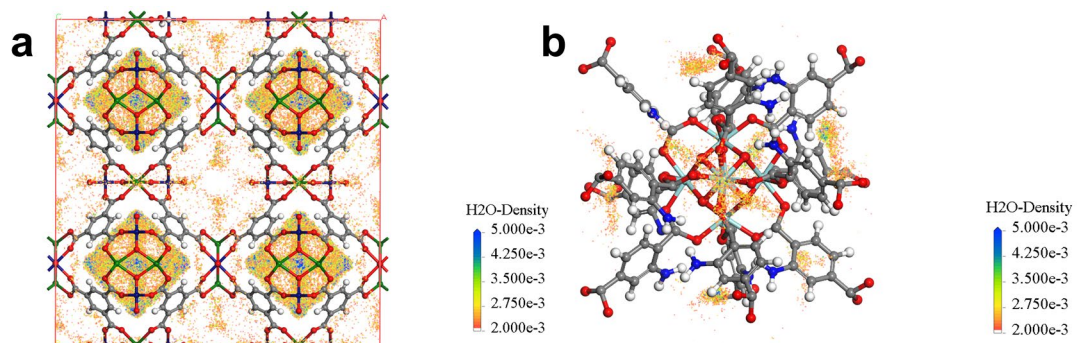

**Fig. S32** GCMC simulation for density distributions of H<sub>2</sub>O at 298 K for (a) MUV-10 and (b) UiO-66-NH<sub>2</sub>.

**Table S1.** Calculation details about the AQE of UiO-66-NH<sub>2</sub>/MUV-10.

| <b>I×S (W)</b> | <b>λ (nm)</b> | <b>A</b> | <b>v<sub>CO</sub> (mol s<sup>-1</sup>)</b> | <b>v<sub>CH<sub>4</sub></sub> (mol s<sup>-1</sup>)</b> | <b>AQE (%)</b> |
|----------------|---------------|----------|--------------------------------------------|--------------------------------------------------------|----------------|
| 0.292          | 380           | 0.48     | $7.98637 \times 10^{-12}$                  | $1.41738 \times 10^{-12}$                              | 0.006          |
| 0.229          | 420           | 0.23     | $3.20112 \times 10^{-12}$                  | $3.08333 \times 10^{-12}$                              | 0.005          |
| 0.512          | 500           | 0.086    | $1.2375 \times 10^{-12}$                   | $1.79688 \times 10^{-12}$                              | 0.001          |

**Table S2.** Summary of the photocatalytic activity with the recently reported photocatalysts in direct gas–solid-phase photocatalytic conversion of CO<sub>2</sub>.

| Photocatalysts                                   | Conditions                                                                             | Light intensity (W) | Main products ( $\mu\text{mol g}^{-1} \text{h}^{-1}$ )        | AQE(%)              | Ref.      |
|--------------------------------------------------|----------------------------------------------------------------------------------------|---------------------|---------------------------------------------------------------|---------------------|-----------|
| UiO-66-NH <sub>2</sub> /MUV-10                   | CO <sub>2</sub> , H <sub>2</sub> O, $\lambda > 400 \text{ nm}$                         | 300                 | CO: 37.7                                                      | 0.005 (420 nm)      | This work |
| PCN-601                                          | CO <sub>2</sub> , H <sub>2</sub> O, $\lambda > 410 \text{ nm}$                         | /                   | CH <sub>4</sub> : 10.1;<br>CO: 6.0                            | /                   | S1        |
| 2D porphyrin-based Mn-MOF                        | CO <sub>2</sub> , H <sub>2</sub> O, simulated solar irradiation (AM 1.5G)              | 300                 | CH <sub>4</sub> : 53;<br>CO: 21                               | /                   | S2        |
| CsPbBr <sub>3</sub> @ZIF-67                      | CO <sub>2</sub> , H <sub>2</sub> O, A 100 W Xe lamp with AM 1.5G filter                | 100                 | CH <sub>4</sub> : 2.35;<br>CO: 0.49                           | 0.035 (386 nm)      | S3        |
| CPO-27-Mg/TiO <sub>2</sub>                       | CO <sub>2</sub> , H <sub>2</sub> O, $\lambda = 365 \text{ nm}$                         | 4                   | CO: 4.09;<br>CH <sub>4</sub> : 2.35;<br>O <sub>2</sub> : 6.29 | /                   | S4        |
| CsPbBr <sub>3</sub> QDs/UiO-66(NH <sub>2</sub> ) | CO <sub>2</sub> , H <sub>2</sub> O, $\lambda > 420 \text{ nm}$                         | 300                 | CH <sub>4</sub> : 0.26;<br>CO: 8.21                           | /                   | S5        |
| HKUST-1/TiO <sub>2</sub>                         | CO <sub>2</sub> , H <sub>2</sub> O, 450 W Xe lamp with an AM 1.5G filter               | 450                 | CO: 256.35                                                    | /                   | S6        |
| HCP-3                                            | CO <sub>2</sub> , H <sub>2</sub> O, $\lambda > 325 \text{ nm}$                         | 300                 | CH <sub>4</sub> : 0.3;<br>CO: 5.1                             | 0.0005 (400-900 nm) | S7        |
| HCP-TiO <sub>2</sub> -FG                         | CO <sub>2</sub> , H <sub>2</sub> O, $\lambda > 420 \text{ nm}$                         | 300                 | CH <sub>4</sub> : 27.62                                       | /                   | S8        |
| Cu/TiO <sub>2</sub> -AG                          | 0.5 vol% O <sub>2</sub> in CO <sub>2</sub> UV-/vis light (320–500 nm)                  | 2.5                 | CO: 28.2                                                      | /                   | S9        |
| VO-STMn <sub>0.2</sub>                           | CO <sub>2</sub> , H <sub>2</sub> O                                                     | 300                 | CH <sub>4</sub> : 6.07                                        | 0.35 (380 nm)       | S10       |
| Co-MOF/Cu <sub>2</sub> O                         | CO <sub>2</sub> , H <sub>2</sub> O, 300 W Xe lamp with a 420 nm cut-off optical filter | 300                 | CO: 3.83                                                      | /                   | S11       |
| CCN                                              | CO <sub>2</sub> , H <sub>2</sub> O, $\lambda > 400 \text{ nm}$                         | 300                 | CO: 25.7                                                      | 0.33 (420 nm)       | S12       |
| CsPbBr <sub>3</sub> /Au/TiO <sub>2</sub>         | CO <sub>2</sub> , AM 1.5 G, 100 mW·cm <sup>-2</sup>                                    | 300                 | CO: 17.27<br>CH <sub>4</sub> : 1.22                           | /                   | S13       |



**Table S3.** Fitting results of  $R_{\Omega}$  and  $R_{ct}$  of the EIS Nyquist plots.

| Sample                         | $R_{\Omega}/\Omega$<br>(without light) | $R_{\Omega}/\Omega$<br>(light) | $R_{ct}/k\Omega$<br>(without light) | $R_{ct}/k\Omega$<br>(light) | Cp<br>(without light)  | Cp<br>(light)          |
|--------------------------------|----------------------------------------|--------------------------------|-------------------------------------|-----------------------------|------------------------|------------------------|
| MUV-10                         | 54.37                                  | 53.93                          | 133.6                               | 100.4                       | $1.196 \times 10^{-5}$ | $1.225 \times 10^{-5}$ |
| UiO-66-NH <sub>2</sub>         | 36.72                                  | 50.2                           | 246.6                               | 101.6                       | $5.186 \times 10^{-5}$ | $2.348 \times 10^{-5}$ |
| UiO-66-NH <sub>2</sub> /MUV-10 | 56.74                                  | 49.69                          | 103.9                               | 91.36                       | $2.389 \times 10^{-5}$ | $2.375 \times 10^{-5}$ |

## References

- S1. Z.B. Fang, T.T. Liu, J. Liu, S. Jin, X.P. Wu, X.Q. Gong, K. Wang, Q. Yin, T.F. Liu, R. Cao, H.C. Zhou, *J. Am. Chem. Soc.*, 2020, **142**, 12515–12523.
- S2. J.-H. Qin, P. Xu, Y.-D. Huang, L.-Y. Xiao, W. Lu, X.-G. Yang, L.-F. Ma, S.-Q. Zang, *Chem. Commun.*, 2021, **57**, 8468.
- S3. Z.-C. Kong, J.-F. Liao, Y.-J. Dong, Y.-F. Xu, H.-Y. Chen, D.-B. Kuang, C.-Y. Su, *ACS Energy Lett.*, 2018, **3**, 2656–2662.
- S4. M. Wang, D. Wang, Z. Li, *Appl. Catal. B-Environ.*, 2016, **183**, 47–52.
- S5. S. Wan, M. Ou, Q. Zhong, X. Wang, *Chem. Eng. J.*, 2019, **358**, 1287–1295.
- S6. X. He, Z. Gan, S. Fisenko, D. Wang, H.M. El-Kaderi, W.N. Wang, *ACS Appl. Mater. Interfaces*, 2017, **9**, 9688–9698.
- S7. G.E.M. Schukraft, R.T. Woodward, S. Kumar, M. Sachs, S. Eslava, C. Petit, *ChemSusChem*, 2021, **14**, 1720–1727.
- S8. S. Wang, M. Xu, T. Peng, C. Zhang, T. Li, I. Hussain, J. Wang, B. Tan, *Nat. Commun.*, 2019, **10**, 676.
- S9. S. Kreft, R. Schoch, J. Schneidewind, J. Rabeah, E.V. Kondratenko, V. A. Kondratenko, H. Junge, M. Bauer, S. Wohlrab, M. Beller, *Chem*, 2019, **5**, 1818–1833.
- S10. Y. Gao, M. Zhang, Y. Jin, M. Zhou, Y. Mao, J. Sun, W. Wang, Z. Song, *Appl. Catal. B.*, 2023, **341**, 123348.
- S11. D. Wen-Wen, J. Jing, W. Ye, A. Jun-Rong, Y. Ou-Yang, G. Xue-Jing, L. Yun-Ling, Z. Jun, L. Dong-Sheng, *Chem. Eng. J.*, 2022, **438**, 135622.
- S12. Y. Li, Y. Xue, X. Gao, L. Wang, X. Liu, Z. Wang, S. Shen, *Adv. Funct. Mater.*, 2023, **34**, 2312634.
- S13. W. Song, K. C. Chong, G. Qi, Y. Xiao, G. Chen, B. Li, Y. Tang, X. Zhang, Y. Yao, Z. Lin, Z. Zou, B. Liu, *J. Am. Chem. Soc.*, 2024, **146**, 3303–3314.
